# Supplementary material
Source: PubMed Central journal article supplement (PMC4170920)
Supplement: NIHMS579964-supplement-1.pdf [file NIHMS579964-supplement-1.pdf]

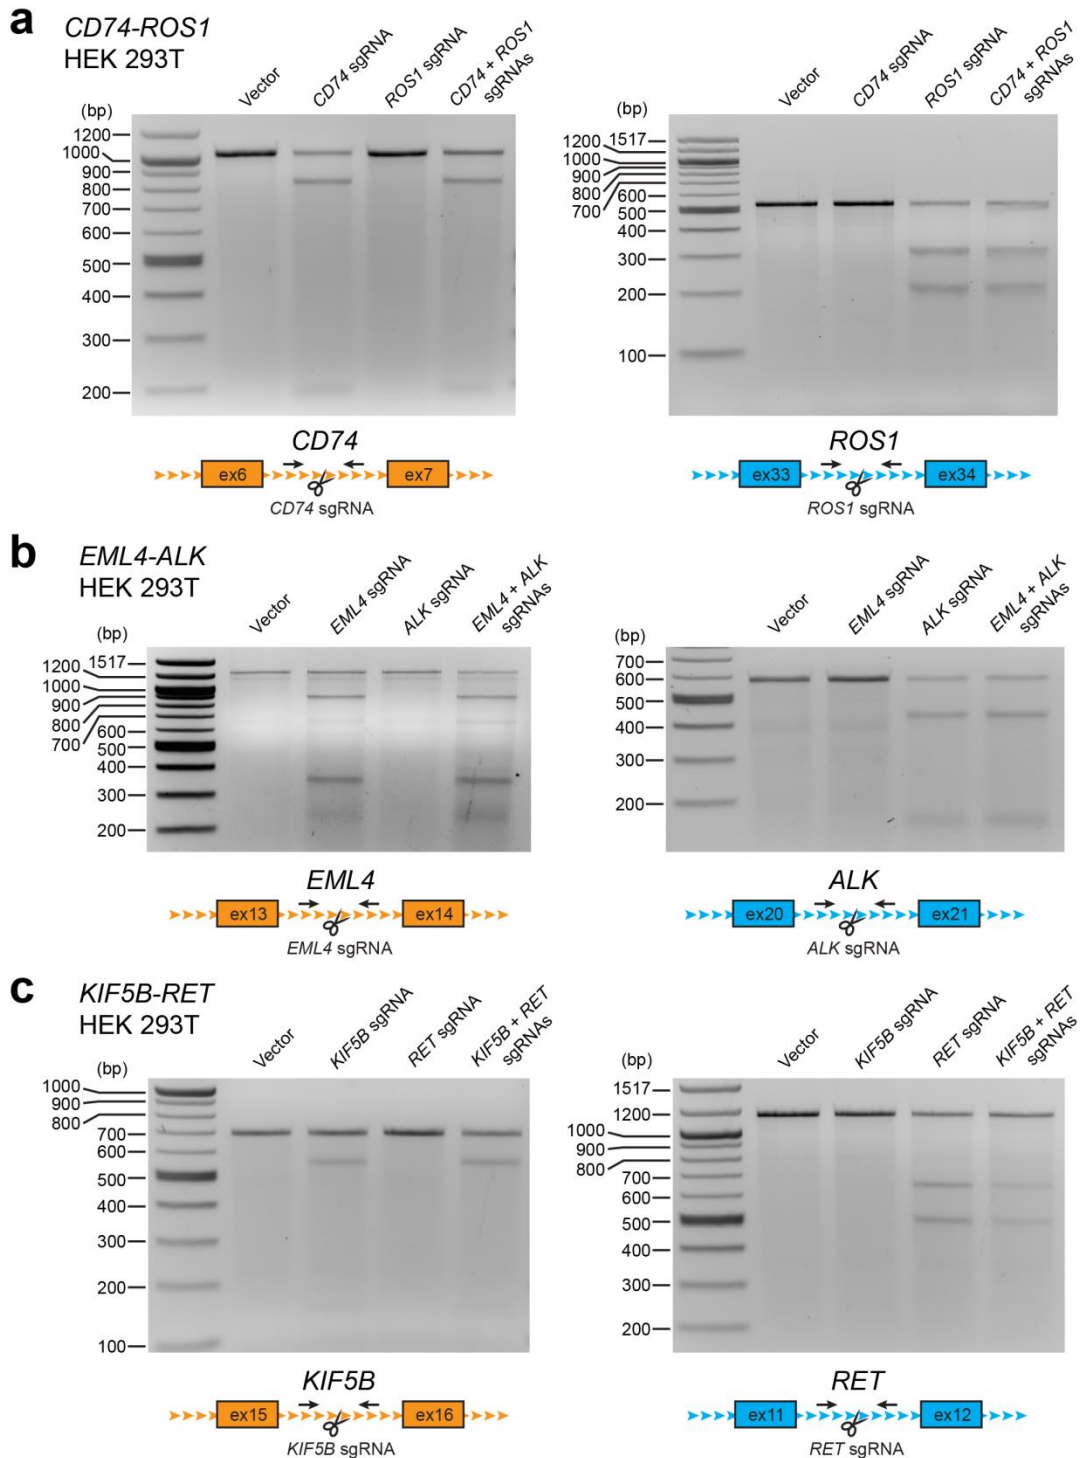

**Supplementary Figure 1 – Surveyor assay for each targeted genomic region.** a-c) HEK 293T cells were transfected with constructs expressing Cas9 alone (vector) or with a targeting sgRNA. For each sgRNA target site, the surrounding genomic region was amplified by PCR and subjected to the Surveyor assay to assess the formation of indels.

**a** *CD74-ROS1* Der(6) genomic breakpoint sequences (293T)

```
EXPECTED  ATTCAGGGTCCTGAAGTAGAAGGT-CACAGGCTGGATTACTTAATCCCT
CLONE 1    ATTCAGGGTCCTGAAGTAGAAGGTTCACAGGCTGGATTACTTAATCCCT
CLONE 2    ATTCAGGGTCCTGAAGTAGAAGGT-CACAGGCTGGATTACTTAATCCCT
CLONE 3    ATTCAGGGTCCTGAAGTAGAAGGT-CACAGGCTGGATTACTTAATCCCT
CLONE 4    ATTCAGGGTCCTGAAGTAGAAGGT-CACAGGCTGGATTACTTAATCCCT
CLONE 5    ATTCAGGGTCCTGAAGTAGAAGGT-CACAGGCTGGATTACTTAATCCCT
CLONE 6    ATTCAGGGTCCTGAAGTAGAAGGT-CACAGGCTGGATTACTTAATCCCT
CLONE 7    ATTCAGGGTCCTGAAGTAGAAGGT-CACAGGCTGGATTACTTAATCCCT
CLONE 8    ATTCAGGGTCCTGAAGTAGAAG-T-CACAGGCTGGATTACTTAATCCCT
CLONE 9    ATTCAGGGTCCTGA-----ATTACTTAATCCCT
CLONE 10   ATTCAGG-----GTGGATTACTTAATCCCT
```

**b** *ROS1-CD74* Der(5) genomic breakpoint sequences (293T)

```
EXPECTED  ACAGTTAAATTTAGTTGAAG-CAAAGGGCCACCCTGCCTGGGGCCTCAG
CLONE 1    ACAGTTAAATTTAGTTGAAGTCAAAGGGCCACCCTGCCTGGGGCCTCAG
CLONE 2    ACAGTTAAATTTAGTTGAAG-CAAAGGGCCACCCTGCCTGGGGCCTCAG
CLONE 3    ACAGTTAAATTTAGTTGAAG-CAAAGGGCCACCCTGCCTGGGGCCTCAG
CLONE 4    ACAGTTAAATTTAGTTGAAG-CAAAGGGCCACCCTGCCTGGGGCCTCAG
CLONE 5    ACAGTTAAATTTAGTTGAA-----GGCCTGGGGCCTCAG
CLONE 6    ACAGTTAAATTTAGTTGAA-----GGCCTGGGGCCTCAG
CLONE 7    ACAGTTAAATTTAGT-----GCCTGGGGCCTCAG
CLONE 8    ACAGTTAAATTTAGT-----GCCTGGGGCCTCAG
```

**c** *CD74-ROS1* fusion transcript sequence (293T)

```
ACACCATGGAGACCATAGACTGGAAGGTCTTTGAGAGCTGGATGCACCATGGCTCCTGT
TTGAAATGAGCAGGCACTCCTTGGAGCAAAGCCCACTGACGCTCCACCGAAAGATGATT
TTTGGATACCAGAAACAAGTTTCATACCTACTATTATAGTTGGAATATTCTGGTTGTTA
CAATCCCACTGACCTTTGTCTGGC
```

**Supplementary Figure 2 – Sequences of *CD74-ROS1* genomic breakpoints and cDNA fusion transcripts.** a-b) Alignment of sequences from cloned PCR products corresponding to the *CD74-ROS1* Der(6) and *ROS1-CD74* Der(5) genomic breakpoint junctions. c) Sequence of PCR product corresponding to the *CD74-ROS1* cDNA fusion transcript.

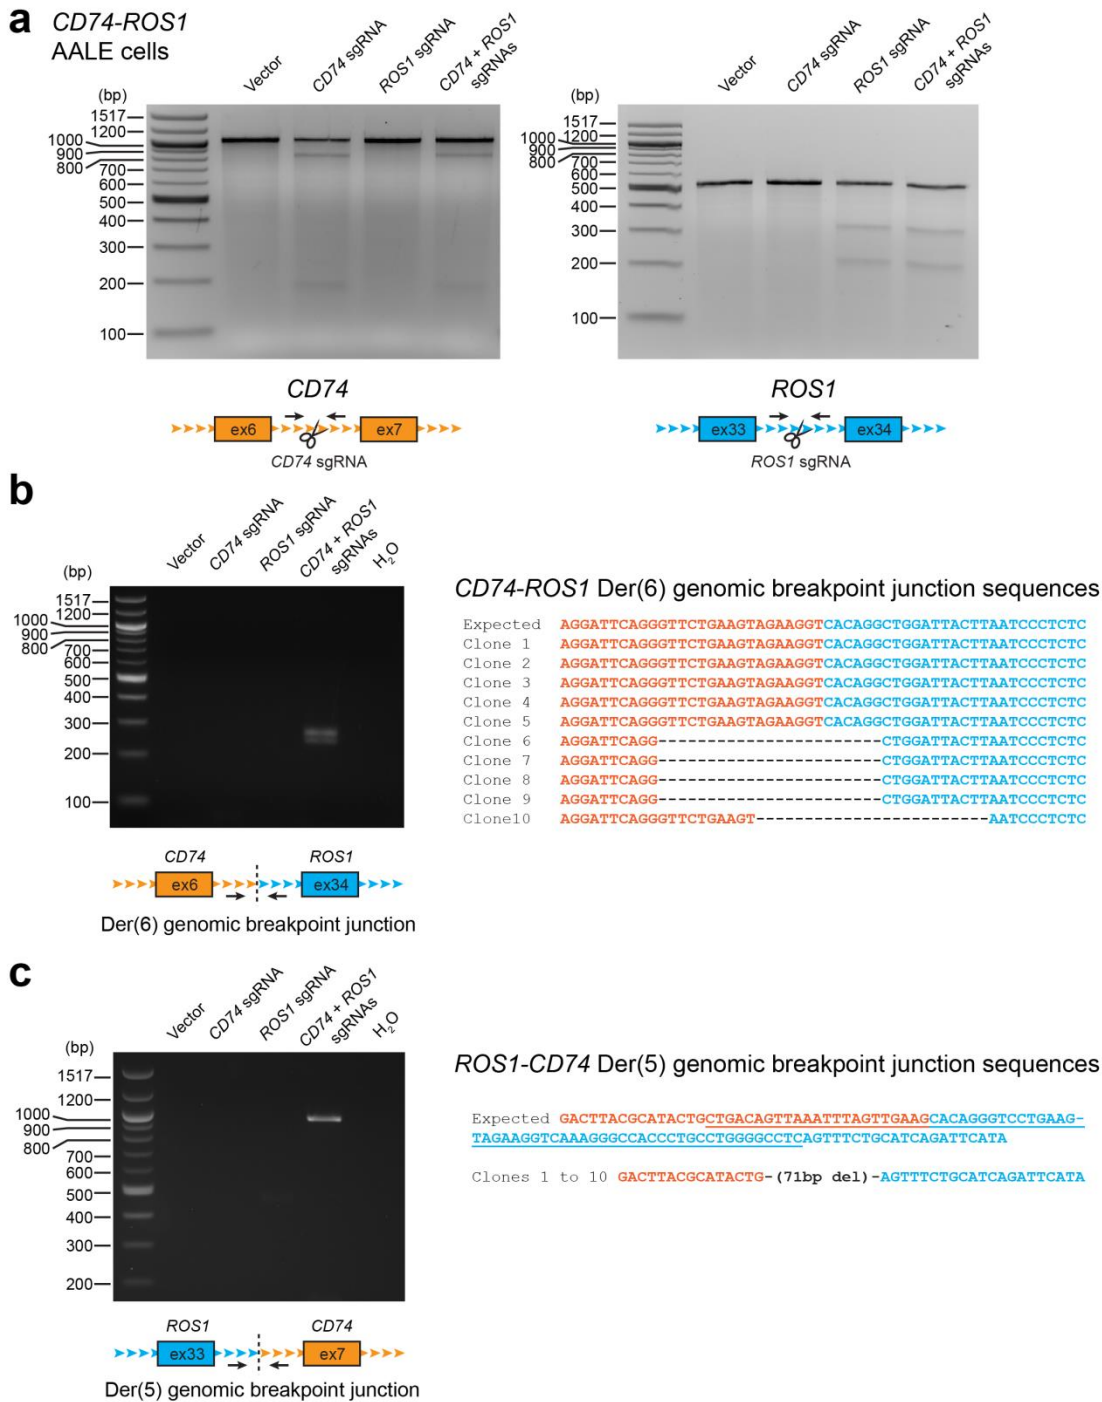

**Supplementary Figure 3 – *CD74-ROS1* translocation generated in immortalized lung epithelial cells.** AALE cells were transfected with constructs expressing Cas9 alone (vector) or with *CD74* sgRNA only, *ROS1* sgRNA only, or both *CD74* and *ROS1* sgRNAs. a) The region surrounding the targeted site was amplified and subjected to the Surveyor assay to assess indel formation. b-c) PCR detection of the b) *CD74-ROS1* Der(6) and c) *ROS1-CD74* Der(5) genomic breakpoint junctions. Also shown are sequences of each PCR product. Data shown are representative results from a total of two independent experiments.

**a** *EML4-ALK* genomic breakpoint PCR sequence

GTGAACACAGTTGTGTTGTTCAATTTTTAAGGTATTTTTAGATGATAAATATTGATGTAAGTGGAGACAGTTG  
ACCTGAACAGCAAGTTCTTAGGCTCCATGGCACCCAGGGTGCTTCCACCCAACCTTCCCTCCCTCCCTCGTTC  
ACGTGGGGTTATACTTGCAACACAGTCTGCTGGTTCACCCAGCCTTCCCTGGCTCCCTCCCATTTCCCTCTCA  
TGGGCATTTCTCCTAATAAAATCTGCAGACCATATTGGGTCTAATCCCATCTCCAGTCTGCTTCTTGGAGGAA  
CCAGACTAACATGACTCTGCCCTATATAATAACAAATAATTATTTTTCCATATATCTGATTTTTAGCTTTGCATT  
TACTTTAAATCATGCTTCAATTAAGACACACCTTCTTTAATCATTTTTATTAGTATTTCTAAGTATGATGGAA  
AGGTTTCAGAGCTCAGGGGAGGATATGGAGATCCAGGGAGGCTTCTGTAGGAAGTGGCCTGTGTAGTGCTTCA  
AGGGC

**b** *EML4-ALK* cDNA fusion transcript PCR sequence

GTGGAGTCATGCTTATATGGAGCAAACTACTGTAGAGCCCACACCTGGGAAAGGACCTAAAGTGTACCGCCG  
GAAGCACCAGGAGCTGCAAGCCATGCAGATGGAGCTGCAGAGCCCTGAGTACAAGCTGAGCAAGCTCCGCACC  
TCGACCATCATGACCGACTACAACCCCACTACTGCTTTGCTGGCAAGA

**c** *KIF5B-RET* genomic breakpoint PCR sequence

GCGTGTGCCACCACGCCTGGATAATTTTTGTTTTGTATTTTTAGTAGAGATGGAGTTTCACCGTGTAGCCAGG  
ATGGTCTTGATCTCCTGACCGGAGGTCTGGGCTGGGCCGTGGTCTCATTAGTCTCTGGGGCAGGGGTCAGGGG  
AGACAGTAGACCAGGAACCAGAGAGGGTCGAAGTAC

**d** *KIF5B-RET* cDNA fusion transcript PCR sequence

GGCATCTTTACTAAAAGACCTTGCAGAAATAGGAATTGCTGTGGGAAATAATGATGTAAAGGAGGATCCAAAGT  
GGGAATTCCTCGGAAGAAGTGGTTCTTGGAAAACTCTAGGAGAAGGCGAATTTGGA

**Supplementary Figure 4 – Sequences of *EML4-ALK* and *KIF5B-RET* genomic breakpoints and cDNA fusion transcripts.** PCR products from detection of the *EML4-ALK* and *KIF5B-RET* genomic breakpoints (a,c) and cDNA fusion transcripts (b,d) were directly sequenced.

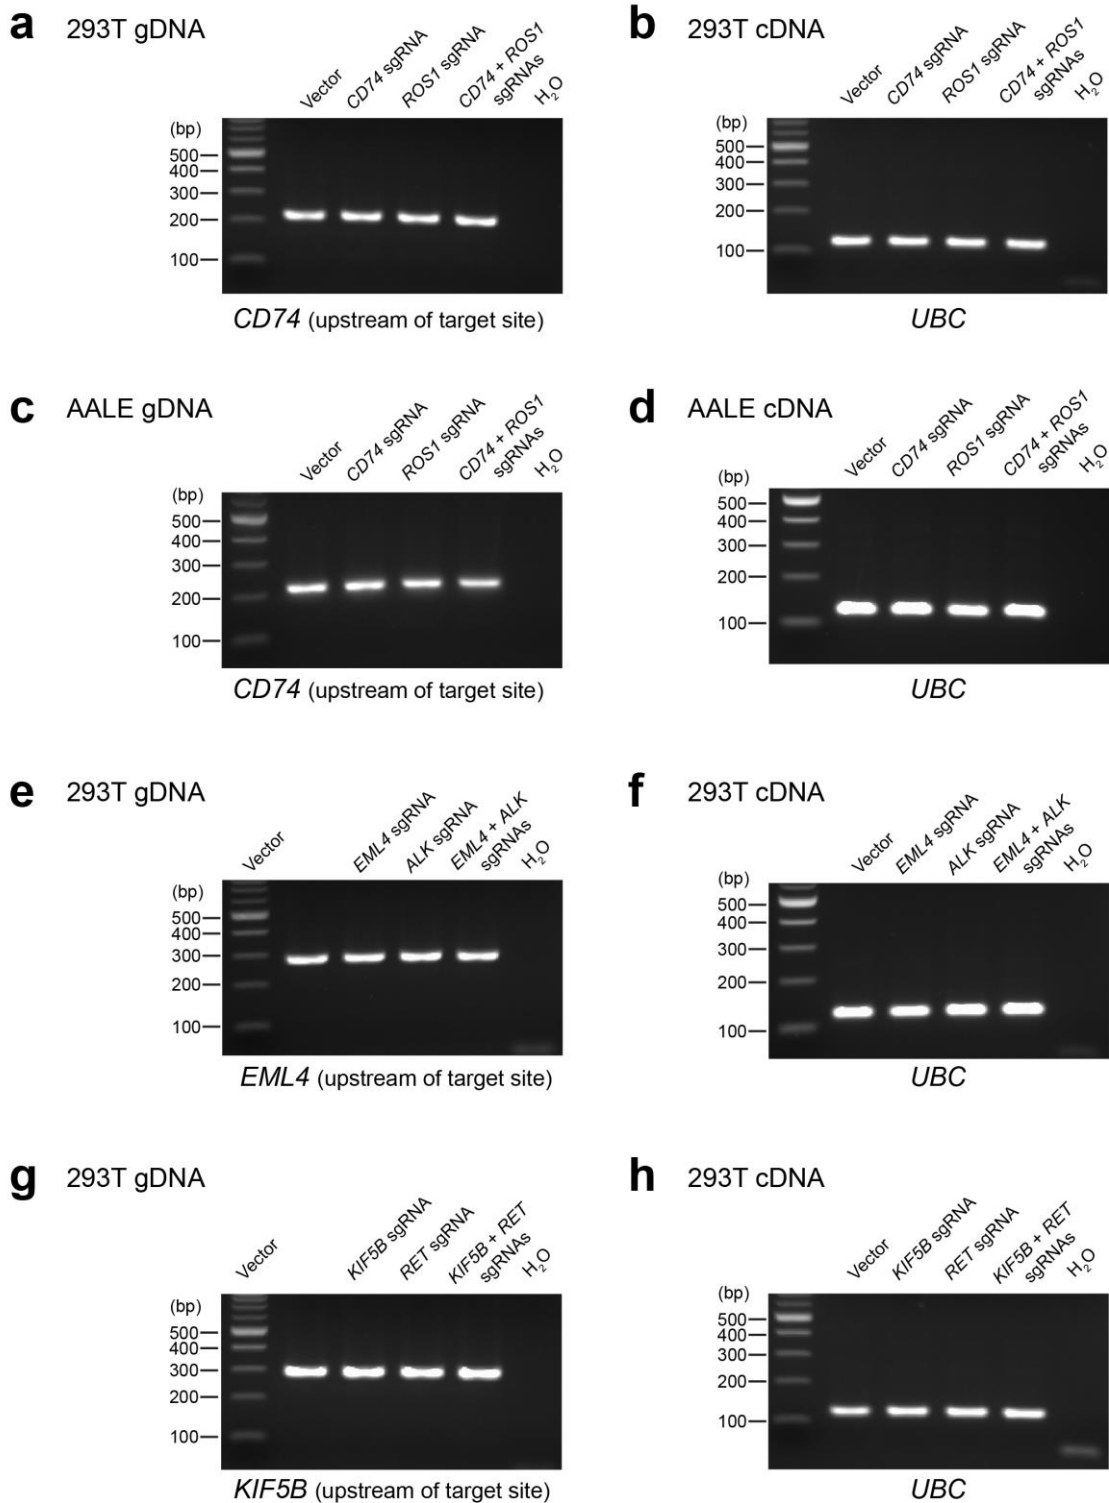

**Supplementary Figure 5 – Control PCR reactions for all genomic DNA and cDNA samples.** For each genomic DNA sample, a unique set of primers were designed to amplify a region upstream of one of the targeted sites to serve as a control PCR reaction (a,c,e,g). For all cDNA samples, the housekeeping gene *UBC* was amplified as the control (b,d,f,h). Primers are listed in Supplementary Table 1.

**Supplementary Table 1 – Primers used in this study**

| <b>Oligos for cloning of sgRNAs</b>                          |                                        |                                        |
|--------------------------------------------------------------|----------------------------------------|----------------------------------------|
| <b>sgRNA target</b>                                          | <b>Forward primer (5' &gt;&gt; 3')</b> | <b>Reverse primer (5' &gt;&gt; 3')</b> |
| <i>EML4</i>                                                  | CACCGACCTGAACAGCAAGTTTGT               | AAACACAAACTTGCTGTTTCAGGTC              |
| <i>ALK</i>                                                   | CACCGGCCTTGCTGAAACTTCCTT               | AAACAAGGAAGTTTCAGCAAGGCC               |
| <i>KIF5B</i>                                                 | CACCGGTGGGCAGATAAAGAGGTC               | AAACGACCTCTTTATCTGCCACC                |
| <i>RET</i>                                                   | CACCGACACTTCCACTGTAGTCAG               | AAACCTGACTACAGTGGAAAGTGTC              |
| <i>CD74</i>                                                  | CACCGTCCTGAAGTAGAAGGTCAA               | AAACTTGACCTTCTACTTCAGGAC               |
| <i>ROS1</i>                                                  | CACCGTTAAATTTAGTTGAAGCAC               | AAACGTGCTTCAACTAAATTTAAC               |
| <b>Primers to amplify genomic breakpoint</b>                 |                                        |                                        |
| <b>Target</b>                                                | <b>Forward primer (5' &gt;&gt; 3')</b> | <b>Reverse primer (5' &gt;&gt; 3')</b> |
| <i>EML4-ALK</i>                                              | GTCCTCCCTCTCGTGGTAAC                   | GCCCTTGAAGCACTACACAG                   |
| <i>KIF5B-RET</i>                                             | CTCACTATGGGGCCACTTGAC                  | GTACTTCGACCCTCTCTGGTTC                 |
| <i>CD74-ROS1 Der(6)</i>                                      | CCAAGAGAGCCTTGGGCGTT                   | AAGACCTCACATGCCACAAAGAAG               |
| <i>ROS1-CD74 Der(5)</i>                                      | ACCACATCAATTCATGCTCCTAA                | TCTTCTGACACTCAAAGCCCATT                |
| <b>Primers to amplify cDNA fusions</b>                       |                                        |                                        |
| <b>Target</b>                                                | <b>Forward primer (5' &gt;&gt; 3')</b> | <b>Reverse primer (5' &gt;&gt; 3')</b> |
| <i>EML4-ALK</i>                                              | GTGCAGTGTTAGCATTCTGGGG                 | TCTTGCCAGCAAAGCAGTAGTTGG               |
| <i>KIF5B-RET</i>                                             | AGGAAATGACCAACCACCAG                   | TCCAAATTCGCCTTCTCCTA                   |
| <i>CD74-ROS1</i>                                             | ATGCACCTGCTCCAGAATGC                   | GCCAGACAAAGGTCAGTGGG                   |
| <b>Primers to amplify targeted region for surveyor assay</b> |                                        |                                        |
| <b>Target</b>                                                | <b>Forward primer (5' &gt;&gt; 3')</b> | <b>Reverse primer (5' &gt;&gt; 3')</b> |
| <i>EML4</i>                                                  | TGGCAGGCAGTGTAACCTTGC                  | CAGATAGTGGTGATGGCTGCAC                 |
| <i>ALK</i>                                                   | CACCCTCAAATCCACTGCTG                   | GGCCCTTGAAGCACTACACAG                  |
| <i>KIF5B</i>                                                 | GGGTTTCATGCCATTCTCCCA                  | CACCATGCTCAGCCTACACA                   |
| <i>RET</i>                                                   | CGCCCTCATGTGCTTATTGC                   | CTCGCTCTGCTTCTCTAGGC                   |
| <i>CD74</i>                                                  | GCTGCAGAGTATGTGGGGTT                   | AGCAATGGGCACCTTGGTAA                   |
| <i>ROS1</i>                                                  | CCAGCCTTATGACCACTCCT                   | GCAAACACAGGGCCAAAGAC                   |
| <b>Primers for control PCRs</b>                              |                                        |                                        |
| <b>Target</b>                                                | <b>Forward primer (5' &gt;&gt; 3')</b> | <b>Reverse primer (5' &gt;&gt; 3')</b> |
| <i>EML4</i> upstream                                         | GGAGCGGCAATTCACTAACA                   | CAGGTGTGGGCTCTACAGTA                   |
| <i>KIF5B</i> upstream                                        | GAGCAGCTGAGATGATGGCA                   | AGGTCCAATAAATGCCGCCT                   |
| <i>CD74</i> upstream                                         | GCTGCAGAGTATGTGGGGTT                   | CAAACAGGAGCCAATGGTGC                   |
| <i>UBC</i> transcript                                        | CGGGATTTGGGTGCGAGTTCTTG                | CGATGGTGTCACTGGGCTCAAC                 |
